# Pupil-linked arousal is sensitive to subconscious processing of auditory novelty

Sergio Osorio<sup>1,3,\*</sup>, Martín Irani<sup>2,3</sup>, Javiera Herrada<sup>4</sup> and Francisco Aboitiz<sup>1,3,\*</sup>

<sup>1</sup>Laboratory for Cognitive and Evolutionary Neuroscience, Department of Psychiatry, Faculty of Medicine, Pontificia Universidad Católica de Chile, Santiago de Chile.

<sup>2</sup>Laboratory for Neurodynamics of Cognition, Department of Psychiatry, Faculty of Medicine, Pontificia Universidad Católica de Chile, Santiago de Chile.

<sup>3</sup> Interdisciplinary Center for Neuroscience, Pontificia Universidad Católica de Chile, Santiago de Chile

<sup>4</sup> Biomedical Neuroscience Institute (BNI), Faculty of Medicine, Universidad de Chile, Santiago De Chile

\*Corresponding authors: Sergio Osorio – srosorio@uc.cl, Francisco Aboitiz – faboitiz@uc.cl

## Abstract

The ability to detect novelty in sensory stimuli is at the base of autonomic and goal-directed behavior. Pupil size, a proxy of the Locus Coeruleus-Norepinephrine system, is sensitive to auditory novelty. However, whether this response reliably reflects conscious processing of novelty remains contentious. Here, we characterized pupil and electrophysiological responses during conscious and subconscious processing of auditory novelty by presenting participants deviant stimuli that were below and above their discriminatory thresholds. We found higher pupil responses to subthreshold targets that were not consciously perceived as deviant stimuli. Larger pupil size and dilation rates were associated to more negative Event-Related Potential values extracted from temporal, prefrontal and anterior cingulate regions. We suggest that increased phasic responses to deviant targets that escape conscious perception reflect Norepinephrine-mediated adaptation of arousal levels in order to meet the perceptual and behavioral demands imposed by the task at hand.

## Introduction

The ability to extract regularities and detect novelty in the form of violations to the statistical properties of sensory information is of paramount importance for biological organisms, as it mediates both autonomic responses and goal-directed behavior (Ranganath and Rainer, 2003; Tiitinen et al., 1994; Sohoglu and Chait, 2016). Conscious processing of novel stimuli, contrast-based saliency and arousal levels can speed up, delay, or even suppress neuronal and behavioral responses (Töllner et al., 2011, Aston-Jones and Cohen, 2005, Vasey et al., 2018). Remarkably, neural populations have

39 the ability of fine-tuning its properties and accommodating neuronal gain-modulation thresholds in  
40 order to meet environmental or task demands (Ferguson and Cardin, 2020). Such gain-modulation  
41 adaptation is mediated by the activity of the Locus Coeruleus – Norepinephrine (LC-NE) system in  
42 response to the demands imposed by environmental and task-specific conditions (Aston-Jones and  
43 Cohen, 2005; Poe et al., 2020). Additionally, pupil size has been shown to reflect NE-mediated  
44 arousal (Aston-Jones and Cohen, 2005; Ferguson and Cardin, 2020) and, more recently, to be  
45 sensitive to the detection of auditory novelty (Quirins et al, 2018; Zhao et al., 2019). However,  
46 whether this response requires conscious processing of sensory novelty remains contentious.

47 A phasic increase in pupil size has been associated with subjects' conscious processing of  
48 single auditory stimuli presentation, but not to auditory stimuli that are not consciously perceived and  
49 reported (Bala et al., 2019). Similarly, consciously reported violations of auditory regularities in tonal  
50 sequences elicit a pupil response during active-counting and passive listening, whereas violations that  
51 escape conscious perception do not elicit a pupil response (Quirins et al, 2018). This line of evidence  
52 suggests that the pupil reflects conscious processing of novel stimuli. In contrast, introducing two  
53 oddballs, each one of different saliency, suppresses the pupil response to the less salient target during  
54 passive engagement. Interestingly, requiring participants to report any detected novelty restores the  
55 pupil response to both targets (Liao et al., 2016A). Likewise, abrupt violations of auditory regularities  
56 but not sudden regularity emergence elicit an increase in pupil size during passive listening. However,  
57 asking participants to monitor any change in the auditory scene results in a pupil response to both  
58 regularity violation and regularity emergence (Zhao et al., 2019). This latter line of evidence therefore  
59 suggests that the phasic pupil response can operate independently of conscious perception and that  
60 behavioral relevance of perceived stimuli might be important in eliciting a pupil response.

61 Two well attested markers of conscious and subconscious processing of auditory novelty are  
62 the Mismatch Negativity (MMN) and the P3 positivity complex. Auditory stimuli that violate the  
63 predictions of the central auditory system elicit an MMN response peaking around 200 milliseconds  
64 after odd stimulus presentation. This Event-Related Potential (ERP) occurs independently of  
65 attentional state or conscious processing (Bekinschtein et al., 2009; Näätänen et al., 2007, 2019).  
66 Generators of this response have been identified in posterior superior and middle temporal and  
67 prefrontal regions (Garrido et al., 2009) and more recently, in anterior portions of the Cingulate  
68 Cortex, a region involved in error detection and the processing of surprisal (Hyman et al., 2017). The  
69 MMN response is proposed to reflect an orienting attention mechanism involved in bottom-up  
70 processing of sensory information (Näätänen et al., 2007, 2019). In turn, novel auditory events that  
71 are attended to and consciously detected elicit a positive deflection in the ERP, known as the P3  
72 response, starting at around 300 milliseconds after the presentation of a novel stimulus (Polich, 2007;

73 Kamp and Donchin, 2015). Multiple generators for this event have been reported within a fronto-  
74 centro-parietal network encompassing dorsomedial prefrontal regions, precentral and postcentral  
75 gyri, superior parietal and cingulate regions (Linden, 2005). The P3 response has been proposed to  
76 reflect context-updating and memory-dependent information processing mechanisms (Polich, 2007).

77 In this study, we investigate how the pupil responds to auditory novelty with and without  
78 conscious perception, and how such response relates to well established markers of subconscious and  
79 conscious auditory processing, namely the MMN and the P3 ERP events. For this, we implemented  
80 a novel task which allowed disentangling conscious from subconscious processing of auditory  
81 novelty by presenting deviant targets above and below each subject's threshold for conscious  
82 discrimination. We found increased pupil responses to subthreshold deviant targets that were not  
83 consciously perceived in contrast to consciously processed suprathreshold targets. Increased pupil  
84 dilation responses were associated to more negative mean ERP values extracted from source-  
85 reconstructed temporal, prefrontal and anterior cingulate regions during the latency time period  
86 corresponding to the MMN. We suggest that an increased pupil response to deviant targets that are  
87 not consciously perceived reflects an increased demand of NE which might be necessary in order to  
88 accommodate current arousal levels to the perceptual and behavioral demands imposed by the task at  
89 hand.

## 90 **Results**

### 91 *Subthreshold deviant targets are associated with high error rates and slower reaction times*

92 All participants performed a staircase procedure which allowed identifying their individual  
93 discriminatory thresholds before each block of the thresholded deviant detection task. The staircase  
94 procedure allowed setting subthreshold deviant targets adaptively and objectively according to the  
95 individual hearing abilities of each participant (Figure 1A). Participants (n = 24, mean age = 25.5,  
96 range = 13) were binaurally presented sequences of narrowband sinusoidal tones and asked to decide  
97 whether the last tonal stimulus (i.e the target tone) was the same as or different from the previous  
98 standard tones (Figure 1B). The target stimulus could be either another standard tone (tgtSTD), a  
99 suprathreshold deviant (supraDEV) or a subthreshold deviant (subDEV). Because subDEV stimuli  
100 were deliberately intended to be below the threshold for conscious discrimination, subthreshold  
101 deviants were expected to be systematically judged as standard tones and should therefore be  
102 associated with high error rates. Conversely, target standards and suprathreshold deviants should be  
103 correctly and systematically identified as such, which should manifest as high accuracy rates.  
104 Asserting that participants conformed to this expected response pattern was important in order to  
105 guarantee that subthreshold deviants were subconsciously processed but not consciously perceived.

106 Therefore, we tested individual accuracy rates for each block and for each set of stimuli within each  
107 condition against the chance probability using a binomial distribution test (Table S2, supplementary  
108 materials). Data from blocks that failed to meet the above-chance performance criterion (i.e.  
109 tgtSTD/correct, subDEV/incorrect, supraDEV/correct) were excluded from subsequent analyses. We  
110 confirmed that both target standards and subthreshold deviant targets were associated with high hit  
111 rates, whereas subthreshold deviant targets were associated with high error rates. (Figure 1C). Next,  
112 we computed median Reaction Times (RTs) and performed group-level statistics. Due to the 1000-  
113 millisecond delay in behavioral response, we did not expect to see a significant difference in median  
114 reaction times across conditions. Interestingly, we found that the median reaction time to  
115 suprathreshold deviant targets was statistically faster than to subthreshold deviant targets at the group-  
116 level ( $n = 21$ ,  $p < 0.05$ , Bonferroni-corrected, Figure 1D). No other statistical differences were found  
117 between median RT.

118

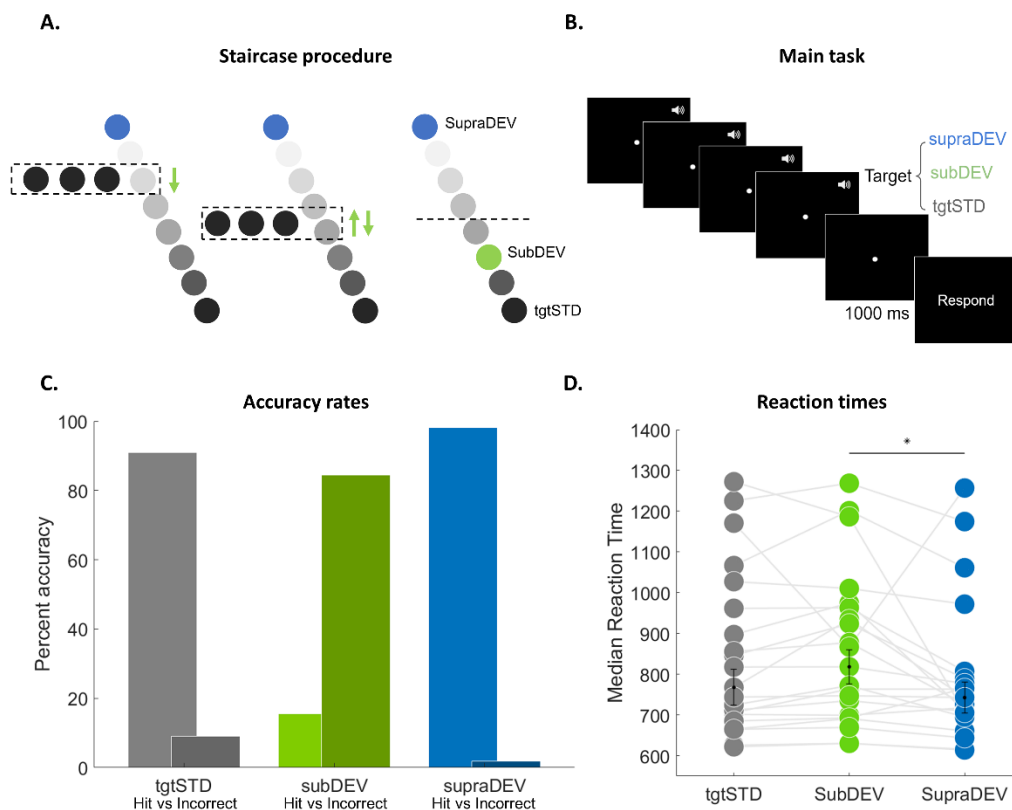

119

120 **Figure 1. A)** Schematic of the staircase procedure. Circles represented pure-narrowband tones. To detect the participant's  
121 discriminatory threshold, a train of standard tones was presented against a target tone. Participants were asked whether the  
122 last tone was the same or different from the previous ones. If the participant responded "different" the target tone was  
123 stepped down in 5Hz. If the participants responded "same", the target tone was stepped-up in 5Hz (see methods). The  
124 threshold was defined as the point at which the participant could no longer discriminate between the standard and the target  
125 and the subDEV stimulus was set accordingly. **B)** Schematic of a single trial of the thresholded-deviant detection task. A

126 train of STD tones were followed by another STD, a SupraDEV or a SubDEV. Participants were instructed to respond  
127 whether the last tone was the same or different from the preceding ones by pressing one of two buttons when a prompt  
128 appeared on screen. **C).** Accuracy rates. Hits (light-shaded bars) and incorrect responses (dark-shaded bars) for the standard  
129 (gray), subthreshold (green) and suprathreshold (blue) target stimuli. All data were above the chance probability. **D)** Median  
130 reaction times for tgtSTD/correct, subDEV/incorrect and supraDEV/correct responses. Asterisk represents a statistically  
131 significant effect.

132

### 133 *Increased pupil response to subthreshold deviant targets that escape conscious perception*

134 Next, we investigated pupil responses to standard, subthreshold deviant and suprathreshold  
135 deviant targets. We computed two measures of phasic pupil change: normalized pupil size and  
136 normalized pupil rate of change. We decided to include pupil rate of change as it provides more time-  
137 resolved information about both pupil dilation and constriction compared to pupil size. As a control  
138 procedure, we inspected the nature of the relationship between pupil size and pupil rate of change  
139 during our 1000-millisecond time window of interest. We confirmed that an increased pupil size was  
140 associated with faster dilation of the pupil whereas a smaller pupil size was associated either with  
141 slower dilation or constriction of the pupil across conditions (Figure S3, supplementary materials).

142 If the pupil reliably reflected conscious processing of auditory novelty, we would expect to  
143 see an increased pupil response to suprathreshold targets that were consciously perceived, but not to  
144 subthreshold targets which escaped conscious perception. In contrast with this expectation, we found  
145 that subthreshold deviants were associated with increased pupil sizes compared to standard and  
146 suprathreshold targets (Figure 2A). This effect was significant between ~180 and ~540 milliseconds  
147 after target stimulus onset compared to suprathreshold deviant targets ( $n = 21$ ,  $p < 0.05$ , Bonferroni-  
148 corrected). Dilation rates were also statistically faster for subthreshold deviants between ~100 and  
149 ~280 milliseconds compared to target standards ( $n = 21$ ,  $p < 0.05$ , Bonferroni-corrected ) and between  
150 ~130 and ~290 milliseconds compared to suprathreshold targets ( $n = 21$ ,  $p < 0.05$ , Bonferroni-  
151 corrected, Figure 2B). No statistical difference was observed between pupil responses to standards  
152 and suprathreshold deviants. These results therefore suggest that the pupil response does not reliably  
153 reflect conscious processing of novel auditory stimulus.

154 We also investigated whether pupil responses were related to reaction times. We found that  
155 subjects who showed bigger pupil sizes also showed slower reaction times between 0 and 900  
156 milliseconds across conditions (tgtSTD:  $n = 17$ ,  $\rho = 0.629$ ,  $p = 0.008$ ; subDEV:  $n = 17$ ,  $\rho = 0.544$ ,  $p =$   
157  $0.026$ ; supraDEV =  $n = 17$ ,  $\rho = 0.580$ ,  $p = 0.016$ , Figure 2C). As for pupil rate of change, we  
158 observed that faster dilation rates were also associated with slower reaction times for standard ( $n = 17$ ,  
159  $\rho = 0.676$ ,  $p = 0.003$ ) and suprathreshold deviant targets ( $n = 17$ ,  $\rho = 0.561$ ,  $p = 0.021$ , Figure  
160 2D), but not for subthreshold targets.

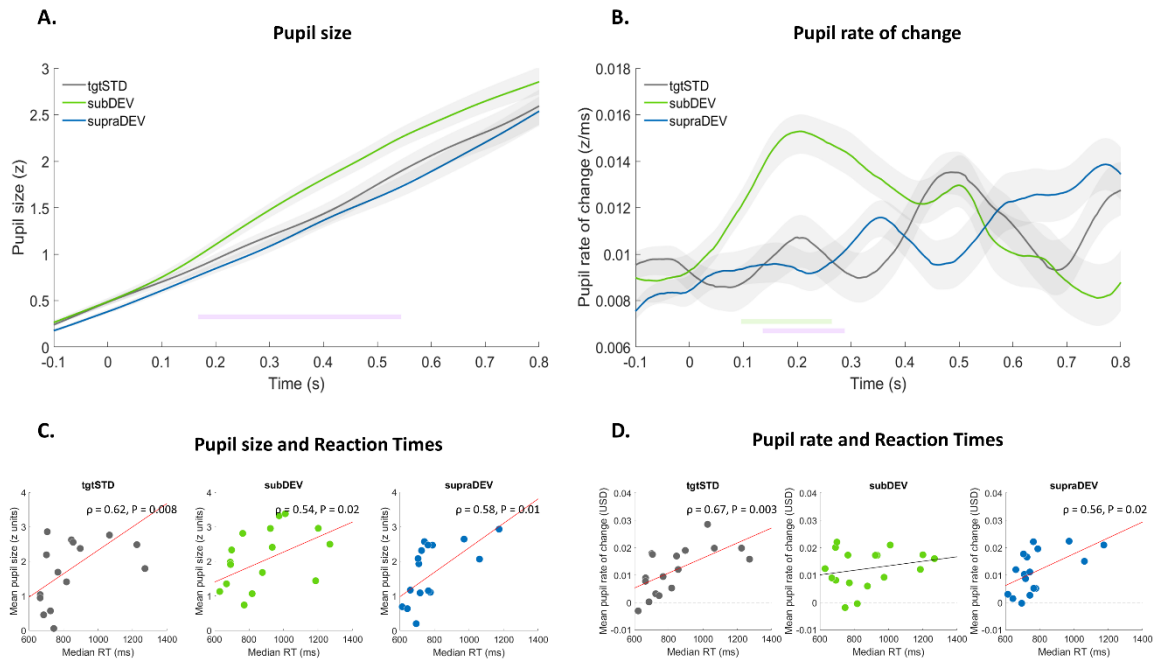

161

162 **Figure 2. A)** Mean pupil size in response to target standards (gray line), subthreshold deviant targets (green line) and  
 163 suprathreshold deviant targets (blue line). Gray shaded areas represent the 95% Confidence Interval (C.I.) for the Standard  
 164 Error of the Mean (S.E.M.) over time calculated using a studentized bootstrapping procedure. The purple line indicates a  
 165 significant difference between subDEV and supraDEV targets. **B)** Mean pupil rate of change calculated as the derivative of  
 166 pupil size (in z units per second). Gray shaded areas represent the 95% C.I. for the S.E.M. Green and purple lines indicate  
 167 a significant effect between subDEV and tgtSTD and between subDEV and supraDEV targets correspondingly ( $n = 21$ ,  $p$   
 168  $< 0.05$ , Bonferroni-corrected). **C)** Non-parametric spearman Correlation between pupil size and median reaction time for  
 169 tgtSTD (left) subDEV (middle) and supraDEV (right). Red least-square lines represent a statistically significant effect. **D)**  
 170 Non-parametric spearman Correlation between pupil rate of change and median reaction time for tgtSTD, subDEV and  
 171 supraDEV.

172

173

### 174 *ERP responses reflect subconscious processing of subthreshold targets and conscious processing* 175 *suprathreshold targets*

176 We then investigated the mean ERP response measured at the scalp level to the three types  
 177 of target stimuli. If the MMN is independent of conscious perception, we would expect to observe an  
 178 MMN to both subthreshold deviant targets incorrectly judged as standard tones and suprathreshold  
 179 deviant targets correctly reported as such. Additionally, if the P3 reflects conscious processing of  
 180 sensory novelty, we should expect to see a P3 response to consciously detected suprathreshold deviant  
 181 targets, but not to subthreshold deviants. In line with these expectations, both subthreshold and  
 182 suprathreshold deviants elicited an MMN neural response at electrode Cz (Figure 2A). This effect  
 183 was significant between ~180 and ~195 milliseconds for subthreshold deviant targets and between  
 184 ~130 and ~196 milliseconds for suprathreshold deviant targets ( $n = 23$ ,  $p < 0.05$ , Bonferroni

185 corrected). In contrast, we observed a P3 response only to suprathreshold deviant targets that were  
186 consciously perceived (Figure 2A). This effect was significant between a wider time window  
187 comprising ~220 and ~440 milliseconds after stimulus presentation ( $n = 23$ ,  $p < 0.05$ , Bonferroni  
188 corrected). Our ERP results thus suggest that subthreshold deviants were subconsciously processed  
189 but escaped conscious perception, whereas suprathreshold deviant targets were both subconsciously  
190 and consciously processed.

191

### 192 *EEG-source imaging reveals involvement of temporal, prefrontal and anterior cingulate regions*

193 In order to inspect the cortical activation dynamics associated to conscious and subconscious  
194 processing of auditory novelty, we projected each participant EEG signals onto template cortical  
195 surfaces. We performed group analyses for the difference in means between both types of deviant  
196 targets (subDEV and supraDEV) against target standards. Unconstrained forward models using the  
197 Minimum Norm solution and source imaging using the sLORETA method on MNI/ICBM152 surface  
198 templates showed patterns of activation consistent with previously reported cortical origins of the  
199 MMN and the P3 ERP responses (Figures 3B and 3C).

200 For subthreshold deviant targets, we observed increased activation of left prefrontal  
201 (DLPFC), left pre and postcentral and right temporo-parietal regions at 192 milliseconds. This  
202 prefrontal activation is consistent with reports of a frontal generator for the MNN response. At 300  
203 milliseconds, subthreshold deviants elicited increased activation of right superior and middle  
204 temporal (STG and MTG) regions, as well as the right insula, but no activation was found for central,  
205 superior parietal or dorsomedial (DMPFC) regions which are classically associated with the P3 event  
206 (Figure 3B). These cortical activation dynamics are in line with the known origins of the MMN in  
207 temporal and prefrontal regions. For suprathreshold deviant targets, we found increased activation of  
208 insular, superior and middle temporal (STG and MTG), and prefrontal regions (DLPFC) bilaterally  
209 at 192 milliseconds. At 300 milliseconds, there was increased activation of dorsomedial prefrontal  
210 regions (DMPFC), superior pre and postcentral and superior parietal areas for suprathreshold deviant  
211 targets (Figure 3C). These latter results are consistent with the known cortical generators of the P3.

212 Finally, we found increased activation of the ACC for both subthreshold and suprathreshold  
213 deviants against target standards. For subthreshold deviants, there was an involvement of the ACC at  
214 between ~220 and ~228 milliseconds (Figure 3D). Suprathreshold deviants also elicited activation of  
215 the ACC between ~220 and ~232 milliseconds, but there was also involvement of the ACC between  
216 ~328 and ~360 milliseconds (Figure 3E). These results confirm the involvement of temporal,  
217 prefrontal and cingulate regions during the latency period corresponding to the MMN and of  
218 dorsomedial and central regions during the time window corresponding to the P3.

219

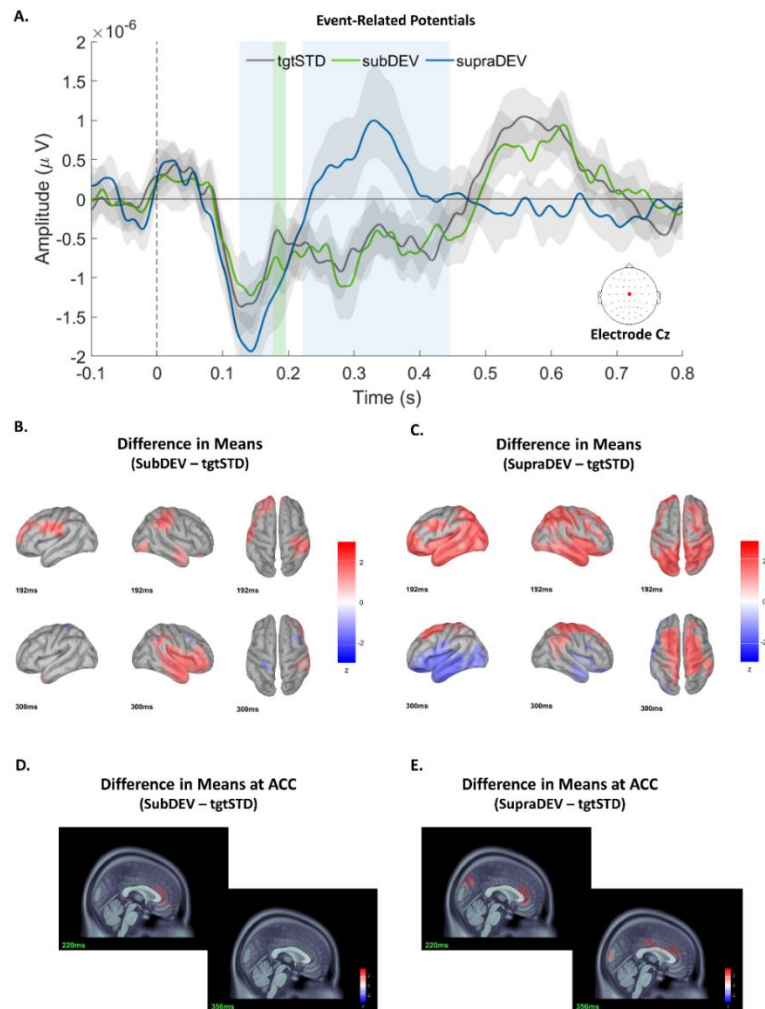

220

221 **Figure 3.** A) Mean ERP response at electrode Cz for target standards (gray line), subthreshold deviants (green line) and  
222 suprathreshold deviants (blue line). Light gray shaded area represents the studentized bootstrapped 95% C.I. of the mean.  
223 Blue shaded area represents time windows of statistical significance between suprathreshold deviant targets against standard  
224 tones. Green shaded area represents statistical significance for subthreshold deviant targets compared to standards. **B)** and  
225 **C)** Difference of means in projected EEG signals onto ICBM-152 template cortical surfaces (see Supplementary materials  
226 for full z-map movie clips). **D)** and **E)** Projection of the EEG signal into template fMRI volumes for subthreshold (**D)** and  
227 suprathreshold deviant targets at 220 and 356 milliseconds.

228

### 229 *Increased pupil responses are associated to more negative source-reconstructed ERP values*

230 Finally, we investigated the relationship between the pupil response and ERPs extracted from  
231 six source-reconstructed regions of interest (ROIs). These regions were informed by the literature on  
232 the generators of the MMN and P3 and our source-imaging results, and included left and right STG,  
233 left and right DLPFC, DMPFC bilaterally and ACC. We performed correlational analyses between



234 our measures of pupil change and the mean ERPs extracted from our ROIs for two time windows of  
235 interest corresponding to our ERP events of interest, namely the MMN response (150-220 ms) and  
236 the P3 (280-320 ms) response. If the pupil response and the P3 were related neural events reflecting  
237 context updating and memory-dependent information processing, we should see that subjects  
238 showing more positive ERP values extracted from bilateral DMPFC or ACC within 280 and 320  
239 milliseconds would also show increased pupil responses. Alternatively, if the pupil response and the  
240 MMN were related neural events reflecting bottom-up orienting attention mechanisms, we would  
241 expect to see that subjects showing more negative ERP values extracted from the STG, the DLPFC  
242 and the ACC within 150 and 220 milliseconds would also show increased pupil responses.

243 We found evidence for the second scenario: for subthreshold targets, faster pupil dilation  
244 rates were associated with more negative ERP values at right STG ( $n = 17$ ,  $\rho = -0.497$ ,  $p = 0.044$ ,  
245 Figure 4A) and right DLPFC ( $n = 17$ ,  $\rho = -0.502$ ,  $p = 0.041$ , Figure 4B) during the 150-to-220-  
246 millisecond time window, but this effect was absent between 280 and 320 milliseconds (Figure S4A  
247 and S4B, supplementary materials). Also for subthreshold targets, a faster rate of change ( $n = 17$ ,  $\rho$   
248  $= -0.664$ ,  $p = 0.004$ , Figure 4C) and bigger pupil size ( $n = 17$ ,  $\rho = -0.750$ ,  $p = 0.008$ , Figure 4D)  
249 were associated to more negative ERP values extracted from the ACC between 280 and 320  
250 milliseconds. This effect was not observed during the 150-220-millisecond time window (Figure S4C,  
251 supplementary materials). Moreover, no effects were found for standard or suprathreshold deviant  
252 targets. These findings suggest that subconscious processing of auditory novelty is associated with  
253 both increased pupil response and more negative values in ERPs extracted from regions and time  
254 periods corresponding to the MMN and the P3.

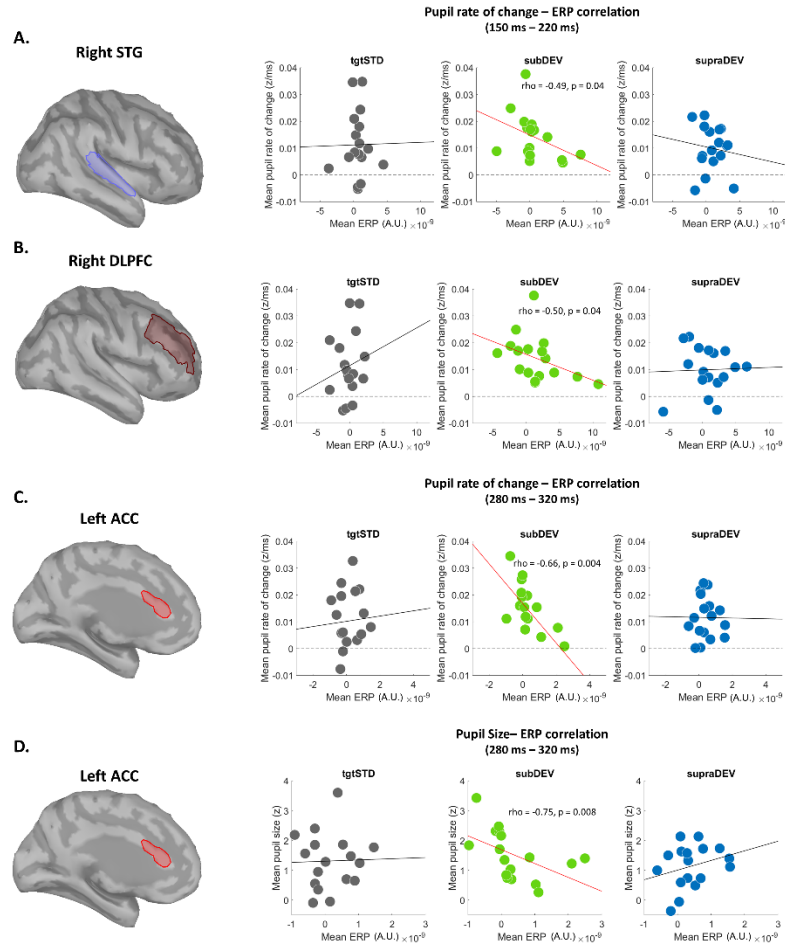

255  
256  
257  
258  
259  
260  
261  
262  
263  
264  
265

**Figure 4.** Non-Parametric spearman correlations between measures of pupil change and source-reconstructed ERP signals. Red least-square lines represent statistically significant effects. **A)** Correlation between mean ERP values extracted from the right Superior Temporal Gyrus (sSTG) and mean pupil rate of change between 150 and 220 milliseconds. **B)** Correlation between mean ERP values extracted from the right Dorsolateral Prefrontal Cortex (DLPFC) and mean pupil rate of change between 150 and 220 milliseconds after stimulus presentation. **C)** Correlation between mean ERP values extracted from the left Anterior Cingulate Cortex (ACC) and mean pupil rate of change between 280 and 320 milliseconds **D)** Correlation between mean ERP values extracted from the left Anterior Cingulate Cortex (ACC) and mean pupil size between 280 and 320 milliseconds.

## 266 Discussion

267 In this study, we investigated the pupil response during the processing of auditory novelty with and  
268 without conscious perception and how it relates to well established markers of subconscious and  
269 conscious auditory processing. Phasic changes in pupil size have been associated to a myriad of  
270 cognitive functions, including effort, saliency, arousal, attention, memory, consciousness among  
271 many others (van der Wel and van Steenbergen, 2018; Wang et al., 2014; 2018; Wainstein et al.,

272 2017; Clewett et al, 2020). This, however, has made it difficult to arrive to an overarching account of  
273 what the pupil reflects across cognitive domains.

274 Some studies have provided evidence that the pupil reflects conscious processing of detected  
275 sensory deviance during the processing of auditory novelty (Bala et al., 2019; Quirins et al., 2018).  
276 However, other results suggest that the pupil response can operate independently of conscious  
277 processing under certain task conditions, thus highlighting the role of behavioral relevance of  
278 perceived stimuli (Liao et al., 2016A; Zhao et al., 2019; Alamia et al., 2019). Our results add up to  
279 the latter line of evidence. Increased pupil size and dilation rates were observed in response to  
280 subthreshold deviant tones that escaped conscious perception and for which there was not an  
281 associated P3 response. In contrast, no pupil response was observed for suprathreshold deviants that  
282 were consciously identified and that elicited a P3 response. This suggests that the pupil does not  
283 reliably reflect conscious processing of detected deviance, as certain task conditions can elicit a pupil  
284 response in the absence of conscious perception.

285 Other studies have previously found that the pupil is sensitive to contrast-based stimulus  
286 saliency, and that a more pronounced pupil response is associated to increased contrast between  
287 standard and deviant stimuli (Liao et al., 2016B; Wang et al., 2014). Similar modulatory effects of  
288 contrast-based saliency have been found for the MMN (Näätänen et al., 2007) and the P3 (Teixeira  
289 et al., 2010; Texeira et al., 2014). If contrast-based saliency was driving pupil responses, we should  
290 have seen a negative correlation between pupil response and MMN across conditions, and a positive  
291 correlation between pupil response and P3 for suprathreshold deviants. However, we observed a pupil  
292 response to the least salient of both deviant targets, whereas no such response was observed to the  
293 most salient one. Moreover, we did not observe linear relationships between measure of pupil change  
294 and the MMN across conditions, or between pupil and P3 for suprathreshold deviants. This suggests  
295 that under our experimental conditions, pupil response was not modulated by contrast-based saliency.

296 Both subthreshold deviants and suprathreshold deviants elicited an MMN response at ~200  
297 milliseconds after target presentation. In contrast, suprathreshold deviants but not subthreshold  
298 deviants elicited a P3 response. This confirms that the staircase procedure along with our thresholded-  
299 deviant detection task effectively resulted in subconscious and conscious processing of auditory  
300 novelty, in line with other adaptations to the classical oddball task, such as the global-local paradigm  
301 (Bekinschtein et al., 2009). Moreover, our results replicate findings which demonstrate that the MMN  
302 operates independently of attentional states and conscious perception, whereas the P3 necessitates the  
303 subject's conscious access to the target stimulus (Bekinschtein et al., 2009; Näätänen et al., 2019;  
304 Polich, 2007; Kamp and Donchin, 2015). EEG source-imaging confirmed that these signals originated  
305 from regions classically associated to the MMN and the P3, including middle temporal, superior

306 temporal, prefrontal, dorsomedial and centro-parietal regions (Garrido et al., 2009; Linden, 2005).  
307 This reassures us that in spite of using a novel task, the events we observed indeed correspond to the  
308 classical ERP events associated to conscious and subconscious processing of auditory novelty. We  
309 also found evidence for the involvement of Cingulate and Insular regions, which is in line with more  
310 recent studies on surprisal and mismatch/error detection (Hyman et al., 2017; Citherlet et al., 2019;  
311 Han et al., 2019). Such results highlight the importance of these cortical areas during the processing  
312 of sensory novelty.

313 Previous studies have failed to identify a straightforward relationship between the pupil  
314 response and ERPs measured at the scalp level, particularly the P3 (Steiner and Barry, 2011; Kamp  
315 and Donchin, 2015). This is surprising because both the phasic pupil and the P3 responses are  
316 modulated by the activity of the LC-NE system (Aston-Jones and Cohen, 2005; Murphy et al., 2011,  
317 Vazey et al., 2018; Nieuwenhuis et al., 2005). Since we did not find evidence of such relationship,  
318 we also conclude that the pupil response and the P3 reflect separate neural mechanisms, even if they  
319 rely on a common neuromodulatory system. In contrast, we found evidence for a highly specific  
320 relationship between phasic pupil response and the MMN during subconscious processing of auditory  
321 novelty. A higher rate of change was associated to more negative ERP values computed from source-  
322 reconstructed signals in right STG, right DLPFC and ACC between 150-220 milliseconds. These  
323 regions and time window overlap with the known generators and latency period of the MMN.  
324 Similarly, increased pupil size and faster dilation rates were associated to more negative ERP values  
325 extracted from the ACC between 280 and 320 milliseconds, a time window associated to the P3 event.  
326 Because the MMN has been associated to Glutamatergic and not to Noradrenergic modulation (Harms  
327 et al., 2020) and because the MMN reliably reflects whereas the pupil is sensitive to, but does not  
328 reliably reflect contrast-based saliency, we suggest that the pupil response and the MMN are both  
329 involved in orienting attention processes but still reflect different neural mechanisms. However, this  
330 effect was only observed for subthreshold deviant targets that escaped conscious perception and not  
331 for consciously processed suprathreshold targets.

332 What then does the pupil response reflect? A growing number of studies have associated  
333 phasic changes in pupil size to the adaptation of arousal levels by the activity of the LC-NE system  
334 (Urai et al., 2017; de Gee et al., 2014; Clewett et al., 2020; Krishnamurthy et al., 2017). Our  
335 observation that increased pupil size was associated to slower reaction times across conditions is  
336 reminiscent of the far-right tail of the Yerkes-Dodson curve (Aston-Jones and Cohen, 2005) and  
337 suggests that the pupil response was driven by changes in arousal levels ensuing the presentation of  
338 target stimuli. Moreover, previous studies have demonstrated that the phasic pupil response is  
339 associated to changes in global arousal levels which are driven by task-specific conditions and

340 decision-making processes (Urai et al., 2017; de Gee et al., 2014). We consider that our findings are  
341 most interpretable in terms of changes in global arousal as a result of phasic LC-NE activity.

342 The Adaptive Gain Theory proposes that the function of phasic LC-NE system activation is  
343 to facilitate changes in arousal for the optimization of behavioral performance according to specific  
344 task demands (Aston-Jones and Cohen, 2005; Poe et al., 2020). Importantly, this theory discriminates  
345 between tonic LC-NE activation, which is associated with baseline LC firing and baseline arousal,  
346 and phasic LC-NE activation, which is associated to evoked LC firing and phasic arousal in response  
347 to stimulus-driven and task-relevant decision processes (Aston-Jones and Cohen, 2005; Gilzenrat et  
348 al, 2010; Poe et al., 2020). Phasic activation of the LC would result in the adaptation of neural gain-  
349 modulation functions thanks to increased NE input, which would in turn modulate cortical excitation-  
350 inhibition balances, thus facilitating the adaptation of arousal levels to meet sensory or behavioral  
351 demands. (Aston-Jones and Cohen, 2005; Ferguson and Cardin, 2020; Batista-Brito et al., 2018).

352 Because pupil size reliably indicates the activation of the LC-NE neurons (Joshi et al., 2016;  
353 Varazzani et al., 2015; Murphy et al., 2014), we therefore suggest that increased pupil responses to  
354 subthreshold targets reflect a higher demand of NE in order to accommodate arousal levels to satisfy  
355 the perceptual and behavioral demands imposed by the thresholded-deviant detection task. This  
356 phasic activation of the LC-NE would presumably follow a feedback signal targeting the LC and  
357 associated to either higher uncertainty (Urai et al., 2017) or prediction error (Sales et al., 2019) during  
358 bottom-up information processing. Interestingly, a plausible neural circuit that could support this  
359 feedback mechanism comprises prefrontal and cingulate regions (Aston-Jones and Cohen, 2005).  
360 Indeed, direct bidirectional projections exist both between the PFC and the LC (Totah et al., 2020)  
361 and the ACC and the LC (Gompf et al, 2010). Temporally, this is also plausible: phasic discharges of  
362 NE are reported as fast as 100 milliseconds after LC stimulation and conduction latency to PFC is of  
363 ~60 milliseconds (Aston-Jones and Cohen, 2005; Aston-Jones et al, 1985), whereas phasic increases  
364 in pupil size resulting from LC microstimulation usually start at around 200-250 milliseconds with a  
365 mean peak latency between 450-550 milliseconds (Joshi et al., 2016).

366 In conclusion, we show that the pupil is sensitive to subconscious processing of auditory  
367 novelty, reflecting higher activity of the LC-NE system which is necessary for the adaptation of  
368 arousal in response to specific task demands. Due to a higher contrast-based saliency, suprathreshold  
369 deviant targets were amenable to both automatic orienting-attention mechanisms (i.e. MMN) and  
370 executive processes involved in conscious processing (i.e. P3). The desired behavioral output could  
371 therefore be obtained without significant changes in the system's arousal levels available upon  
372 stimulus presentation. Subthreshold deviant targets, on the other hand, were below thresholds for  
373 conscious discrimination and posed a significant perceptual challenge. Although detectable by means

374 of automatic bottom-up orienting attention mechanisms (i.e. MMN), they escaped higher-order  
375 executive processes indexed by the P3 that were required to meet the desired behavioral outcome  
376 (deviant detection). This would have resulted in an increase demand of NE to accommodate arousal  
377 levels via the adaptation of gain-modulation functions at relevant sensory and attention-mediating  
378 cortical area, with the presumed goal of lowering thresholds for conscious identification of  
379 subthreshold targets.

380

## 381 **Methods**

382 ***Participant details:*** Twenty-four right-handed healthy subjects with no self-reported record of  
383 auditory, neurological or neuropsychiatric disorders voluntarily agreed to participate in this study  
384 (mean age = 25.5, range = 13). All participants reported normal hearing and normal or corrected-to-  
385 normal vision. Extensive and/or formal musical training, as well as high competence in a second  
386 language were considered exclusion criteria. Participants were recruited from among the  
387 undergraduate and postgraduate community at Pontificia Universidad Católica de Chile and  
388 Universidad de Chile. All participants signed an inform consent prior to their participation in the  
389 study.

390 ***Procedures and stimuli:*** Participants sat 50cm away from of a screen in a dimly lit room. Participants'  
391 brain activity was recorded using a 64-channel Biosemi EEG system and their pupil recorded using  
392 an Eyelink 1000 eye-tracking system. The eye-tracking system was calibrated at the beginning of  
393 each experimental session. Auditory stimuli were presented binaurally via special airtube earphones  
394 (ER-1 Etymotic Research) that minimize electrical interference. Stimuli comprised sequences of 150-  
395 millisecond long narrowband sinusoidal tones (Table S1) presented with an interstimulus interval of  
396 150 milliseconds. Stimuli were set to be delivered at an intensity of 70dBs. Participants sat within a  
397 Faraday cage while performing the task. The task was programmed using the NBS (Neurobehavioral  
398 Systems) Presentation software.

399 ***Staircase procedure:*** Because hearing abilities vary across individuals, all participants performed a  
400 staircase procedure at the beginning of each experimental block and for each set of stimuli. A  
401 sequence of standard tones (dark circles inside dotted box, Figure 1, left) was presented against  
402 another sinusoidal tone (the target) 50 Hz above the standard tone (blue circle). Participant were asked  
403 whether the target was the same or different from the preceding tones. If the subject response was  
404 “different”, a new trial was presented where the target tone was stepped down five 5Hz (green arrow,  
405 Figure 1, left. But see table S1 for the full set of stimuli). Targets would eventually become  
406 increasingly similar to the standard tones (gradient of gray circles). When participants judged a target

407 to be the same as the previous standard tones, the subsequent target tone was stepped up in 5Hz. Once  
408 the subject responses entered a *same-different* response loop (green arrows, Figure 1, middle), the  
409 algorithm would identify this region within the staircase as containing the subjects' discriminatory  
410 threshold. After four consecutive iterations of this same-different response loop, the subject's  
411 discriminatory was set to be the boundary separating the target tone consistently reported as  
412 "different" from the target tone consistently reported as "same" (dotted horizontal line, Figure 1,  
413 right). Finally, the three stimuli were automatically set: the standard (dark gray circle, tgtSTD), the  
414 subthreshold deviant (green circle, subDEV) and the suprathreshold deviant (blue circle, supraDEV).  
415 The subthreshold deviant was always set as the tone being two steps below the discriminatory  
416 threshold and the suprathreshold deviant was always set to be the STD tone plus 50Hz.

417 ***Thresholded deviant detection task:*** The thresholded deviant detection task comprised three blocks.  
418 For each block, the base frequency for standard tones would be either 800Hz, 1000Hz or 1200Hz.  
419 During each trial, participants listened to sequences of tonal stimuli and were instructed to decide  
420 whether the last tone (i.e. the target) was the same or different from the preceding standard tones.  
421 Participants had to make their choice by pressing one of two buttons upon appearance of a prompt on  
422 screen, 1000 milliseconds after the onset of the target stimulus. This delay in behavioral response was  
423 in order to avoid confounding effects due to the temporal and spatial overlap of motor signals and the  
424 ERP events of interest. There was no time limit for response. The number of standard tones before  
425 each target stimulus randomly varied between three and five tones. Random variability in the number  
426 of standard tones before each target was expected to minimize habituation effects. Participants were  
427 told to prioritize response accuracy over speed of response. The target stimulus could be either another  
428 standard tone (tgtSTD), a tone that was 50 Hz above the standard tone (supraDEV) or a tone that was  
429 below each participants' discriminatory threshold as defined by the staircase procedure (subDEV).  
430 The theoretical probability for each type of target was ~33.333%.

431 ***Behavioral data analyses:*** Data ( $n = 24$ ) was obtained using Presentation software. Default output  
432 files were preprocessed and analyzed using in-house Matlab scripts. Each participants' performance  
433 was in each block and for each set of stimuli were tested against the chance probability using a  
434 binomial test (i.e. the probability of observing  $x$  correct or incorrect responses given a theoretical  
435 probability  $p$  for the corresponding number of trials per block  $n$ ). Only data (behavioral, pupil and  
436 EEG) from experimental blocks that were above the chance probability were included in further  
437 analyzes. We failed to identify the discriminatory threshold of 3 of our participants due to problems  
438 during the staircase procedure (e.g. the participant accidentally confused buttons or did not fully  
439 understand the task, resulting in unprecise discriminatory threshold that did not reflect their actual

440 perceptual abilities, Table S2). Reaction times below zero (i.e. before response prompt appeared on  
441 screen) were considered accidental button presses and therefore rejected from analyses. Any reaction  
442 time below and above the 0.25 and the 97.5 percentiles at the subject-level were also defined as  
443 outliers and therefore rejected. Histograms were plotted to inspect the distribution of reaction times.  
444 Because reaction times were right-skewed, approximating a gamma distribution, we computed the  
445 median reaction time and used it for subsequent statistical analyses.

446 **EEG data preprocessing:** Data (n = 23) was preprocessed using Brainstorm (Tadel et al., 2011,  
447 <http://neuroimage.usc.edu/brainstorm>). EEG data was filtered between 1 and 45Hz using a 7426-  
448 order FIR bandpass filter. Subsequently, data was detrended and visually inspected for noisy channels  
449 using Welch's Power Spectrum Density (PSD). Next deleted channels were interpolated and the EEG  
450 signal was re-referenced to the average of all electrodes. Oculomotor and blink-related artifacts were  
451 removed using Independent Component Analysis (Makeig et al., 1996) on the continuous EEG  
452 signal. Data was epoched in trials comprising 2500ms before and 1000ms after presentation of target  
453 stimuli. Any trial where the signal exceeded 100 microvolts in amplitude was rejected from  
454 subsequent analyses. Event Related Potentials were computed as the baseline-corrected arithmetic  
455 average of all individual trials per subject, per target type. Baseline correction was applied by  
456 subtracting the mean ERP between -500 milliseconds and time zero. EEG forward models were  
457 computed using the symmetric Boundary Method BEM by the open source software OpenMEEG  
458 (Gramfort et al. 2010) on default MNI/ICMB152 cortical templates (Fonov et al., 2009) using default  
459 Brainstorm parameters. Source estimation was computed using the Minimum Norm solution and  
460 unconstrained sLORETA (Pasqual-Marqui, 2002) estimates on the preprocessed data. Matrices for  
461 the covariance of all electrodes were computed from approximately 1000ms baseline periods on each  
462 epoche. Regions of Interest were selected *a priori* based on previous literature on auditory mismatch  
463 processing as well as on the origins of the MMN/P3 Event-Related potentials, and were manually  
464 delimited informed by z-maps shown in figure on the ICBM152 template cortical surface (mean  
465 vertices = 188.66). These ROIs were portions of the right and left Superior Temporal Gyrus, right  
466 and left Dorsolateral Prefrontal Cortex, bilateral Dorsomedial Prefrontal Cortex and left Anterior  
467 Cingulate Cortex. Scalp EEG data from one participant was excluded from analyses due to technical  
468 issues during data acquisition.

469 **Pupillometry:** Data (n = 21) was acquired using Eyelinks' default acquisition hardware and software  
470 at a sampling rate of 1000 Hz. Calibration procedures were carried out at the beginning of each  
471 experimental session. Pupil area, horizontal and vertical gaze positions were recorded in a dimly lit  
472 room from the right eye of each participant. Blinks and gaze artifacts were detected by Eyelinks'



473 default algorithms. Pupil data was preprocessed using Urai et al. (2017) pupil pipeline plus additional  
474 in-house Matlab script adaptations. Eyelink-defined and additionally detected blinks were padded by  
475 150 milliseconds and linearly interpolated. The pupil response evoked by blinks and saccadic events  
476 was identified via deconvolution and removed using linear regression as in Knapen et al. (2016). The  
477 signal was then filtered between 0.01 Hz and 10 Hz using a second-order Butterworth filter and then  
478 down sampled to 250 Hz. Data was epoched between 2500 milliseconds before and 1000 milliseconds  
479 after the onset of target stimuli and trials where extreme values were below and above the 0.5 and the  
480 99.5 percentiles were further rejected. Trials were subsequently baseline-normalized (z units) and the  
481 arithmetic average of the pupil size and its derivative for each target type per participant was  
482 estimated. The time window for baseline correction comprised -500 milliseconds to time zero. Pupil  
483 data from three participants was unavailable due to technical problems with output data files or trigger  
484 coding.

485 **Statistics:** All statistical analyses were implemented using custom-made Matlab scripts. Above-  
486 chance performance was tested using a binomial distribution (binomial test). For tgtSTDs and  
487 supraDEVs, the probability of observing  $x$  hits given a theoretical probability of 0.5 and  $n$   
488 observations, where  $n$  is the number of trials per block was tested and data from blocks whose  
489 probability was lower than an alpha value of 0.05 were rejected (Table S2). For subDEVs, the  
490 probability of observing  $x$  incorrect responses given the same theoretical probability and  $n$   
491 observations was calculated and the same rejection criterion was applied. For reaction times, we  
492 calculated the individual median reaction time per condition. We rejected subjects for which there  
493 was no subthreshold deviant data available and performed a two-tailed non-parametric 10,000-  
494 bootstrap resampling procedure to determine whether there was any statistical difference among  
495 conditions. We identified the percentiles corresponding to an alpha level of 0.05, Bonferroni-  
496 corrected and compared the against our observed median reaction times. For pupil data, we calculated  
497 the arithmetic mean pupil size and mean pupil rate of change across conditions. Data from blocks that  
498 failed to meet the above-chance performance criterion were not included. We plotted the times series  
499 data per condition with their 95% confidence intervals for the Standard Error of the Mean. Confidence  
500 intervals were calculated using a studentized 5000-bootstrap procedure. We then performed two-  
501 tailed 10000-bootstrapping timepoint by timepoint. For each timepoint, we tested the probability that  
502 the mean values came from the same distribution at an alpha level of 0.05, Bonferroni-corrected.  
503 Additionally, we set our algorithm to return only statistical effects that extended for more than 5  
504 consecutive timepoints. For scalp ERPs, we performed the same procedure as for pupil data, but  
505 instead of performing the resampling procedure during the entire 1000 window, we performed two  
506 separate tests for our ERP events of interest (MMN and P3) thusly: a one-tailed 1000-bootstrap

507 between 100 and 220 milliseconds and another one-tailed 10000 bootstrap between 200 and 350  
508 milliseconds.

509 Correlations were conducted using the non-parametric Spearman correlation coefficient test. Subjects  
510 for which either pupil data or EEG data was missing were not included in the analyses.

511

## 512 **Acknowledgements**

513

514 This project was funded by CONICYT-FONDECYT Regular Grant N° 283 1160258 and  
515 ANID/CONICYT National Grant for Doctoral Studies N° 2018-21181786. We would also like to  
516 acknowledge Dr. Rodrigo Henriquez-Ch, Dr. Gonzalo Boncompte, Dr. Tomas Ossandón, Vicente  
517 Medel, Marcos Domic and Brice Follet for their advice, feedback and support.

518

## 519 **References**

520

- 521 1. Ranganath, C., & Rainer, G. (2003). Neural mechanisms for detecting and remembering  
522 novel events. *Nature Reviews Neuroscience*, 4(3), 193-202.
- 523 2. Tiitinen, H., May, P., Reinikainen, K., & Näätänen, R. (1994). Attentive novelty detection in  
524 humans is governed by pre-attentive sensory memory. *Nature*, 372(6501), 90-92.
- 525 3. Sohoglu, E., & Chait, M. (2016). Detecting and representing predictable structure during  
526 auditory scene analysis. *Elife*, 5, e19113.
- 527 4. Töllner, T., Zehetleitner, M., Gramann, K., & Müller, H. J. (2011). Stimulus saliency  
528 modulates pre-attentive processing speed in human visual cortex. *PLoS One*, 6(1), e16276.
- 529 5. Aston-Jones, G., & Cohen, J. D. (2005). Adaptive gain and the role of the locus coeruleus–  
530 norepinephrine system in optimal performance. *Journal of Comparative Neurology*, 493(1),  
531 99-110.
- 532 6. Vazey, E. M., Moorman, D. E., & Aston-Jones, G. (2018). Phasic locus coeruleus activity  
533 regulates cortical encoding of salience information. *Proceedings of the National Academy of  
534 Sciences*, 115(40), E9439-E9448.
- 535 7. Ferguson, K. A., & Cardin, J. A. (2020). Mechanisms underlying gain modulation in the  
536 cortex. *Nature Reviews Neuroscience*, 1-13.
- 537 8. Poe, G. R., Foote, S., Eschenko, O., Johansen, J. P., Bouret, S., Aston-Jones, G., ... &  
538 Berridge, C. (2020). Locus coeruleus: a new look at the blue spot. *Nature Reviews  
539 Neuroscience*, 1-16.
- 540 9. Quirins, M., Marois, C., Valente, M., Seassau, M., Weiss, N., El Karoui, I., ... & Naccache,  
541 L. (2018). Conscious processing of auditory regularities induces a pupil dilation. *Scientific  
542 reports*, 8(1), 1-11.
- 543 10. Zhao, S., Chait, M., Dick, F., Dayan, P., Furukawa, S., & Liao, H. I. (2019). Pupil-linked  
544 phasic arousal evoked by violation but not emergence of regularity within rapid sound  
545 sequences. *Nature communications*, 10.

- 546 11. Bala, A. D., Whitchurch, E. A., & Takahashi, T. T. (2019). Human Auditory Detection and  
547 Discrimination Measured with the Pupil Dilation Response. *Journal of the Association for*  
548 *Research in Otolaryngology*, 1-17.
- 549 12. Liao, H. I., Yoneya, M., Kidani, S., Kashino, M., & Furukawa, S. (2016A). Human pupillary  
550 dilation response to deviant auditory stimuli: Effects of stimulus properties and voluntary  
551 attention. *Frontiers in Neuroscience*, 10, 43.
- 552 13. Bekinschtein, T. A., Dehaene, S., Rohaut, B., Tadel, F., Cohen, L., & Naccache, L. (2009).  
553 Neural signature of the conscious processing of auditory regularities. *Proceedings of the*  
554 *National Academy of Sciences*, 106(5), 1672-1677.
- 555 14. Näätänen, R., Paavilainen, P., Rinne, T., & Alho, K. (2007). The mismatch negativity  
556 (MMN) in basic research of central auditory processing: a review. *Clinical*  
557 *neurophysiology*, 118(12), 2544-2590.
- 558 15. Näätänen, R., Kujala, T., & Light, G. (2019). *The Mismatch Negativity (MMN): A window*  
559 *to the brain*. Oxford University Press.
- 560 16. Garrido, M. I., Kilner, J. M., Stephan, K. E., & Friston, K. J. (2009). The mismatch  
561 negativity: a review of underlying mechanisms. *Clinical neurophysiology*, 120(3), 453-463.
- 562 17. Hyman, J. M., Holroyd, C. B., & Seamans, J. K. (2017). A novel neural prediction error  
563 found in anterior cingulate cortex ensembles. *Neuron*, 95(2), 447-456.
- 564 18. Polich, J. (2007). Updating P300: an integrative theory of P3a and P3b. *Clinical*  
565 *neurophysiology*, 118(10), 2128-2148.
- 566 19. Kamp, S. M., & Donchin, E. (2015). ERP and pupil responses to deviance in an oddball  
567 paradigm. *Psychophysiology*, 52(4), 460-471
- 568 20. Linden, D. E. (2005). The P300: where in the brain is it produced and what does it tell  
569 us?. *The Neuroscientist*, 11(6), 563-576.
- 570 21. van der Wel, P., & van Steenbergen, H. (2018). Pupil dilation as an index of effort in  
571 cognitive control tasks: A review. *Psychonomic bulletin & review*, 25(6), 2005-2015.
- 572 22. Wang, C. A., Boehnke, S. E., Itti, L., & Munoz, D. P. (2014). Transient pupil response is  
573 modulated by contrast-based saliency. *Journal of Neuroscience*, 34(2), 408-417.
- 574 23. Wang, C. A., Baird, T., Huang, J., Coutinho, J. D., Brien, D. C., & Munoz, D. P. (2018).  
575 Arousal effects on pupil size, heart rate, and skin conductance in an emotional face  
576 task. *Frontiers in Neurology*, 9, 1029.
- 577 24. Wainstein, G., Rojas-Líbano, D., Crossley, N. A., Carrasco, X., Aboitiz, F., & Ossandón, T.  
578 (2017). Pupil size tracks attentional performance in attention-deficit/hyperactivity  
579 disorder. *Scientific reports*, 7(1), 1-9.
- 580 25. Clewett, D., Gasser, C., & Davachi, L. (2020). Pupil-linked arousal signals track the  
581 temporal organization of events in memory. *Nature Communications*, 11(1), 1-14.
- 582 26. Citherlet, D., Boucher, O., Tremblay, J., Robert, M., Gallagher, A., Bouthillier, A., ... &  
583 Nguyen, D. K. (2019). Role of the insula in top-down processing: an intracranial EEG  
584 study using a visual oddball detection paradigm. *Brain Structure and Function*, 224(6),  
585 2045-2059.
- 586 27. Han, S. W., Eaton, H. P., & Marois, R. (2019). Functional fractionation of the Cingulo-  
587 opercular network: alerting insula and updating cingulate. *Cerebral Cortex*, 29(6), 2624-  
588 2638.
- 589 28. Alamia, A., VanRullen, R., Pasqualotto, E., Mouraux, A., & Zenon, A. (2019). Pupil-linked  
590 arousal responds to unconscious surprisal. *Journal of Neuroscience*, 39(27), 5369-5376.

- 591 29. Liao, H. I., Kidani, S., Yoneya, M., Kashino, M., & Furukawa, S. (2016B).  
592 Correspondences among pupillary dilation response, subjective salience of sounds, and  
593 loudness. *Psychonomic bulletin & review*, 23(2), 412-425.
- 594 30. Teixeira, M., Castelo-Branco, M., Nascimento, S. & Almeida, V. (2010). The p300 signal  
595 is monotonically modulated by target saliency level irrespective of the visual feature  
596 domain. *Acta Ophthalmologica*, 88.
- 597 31. Teixeira, M., Pires, G., Raimundo, M., Nascimento, S., Almeida, V., & Castelo-Branco, M.  
598 (2014). Robust single trial identification of conscious percepts triggered by sensory events  
599 of variable saliency. *PLOS one*, 9(1), e86201.
- 600 32. Steiner, G. Z., & Barry, R. J. (2011). Pupillary responses and event-related potentials as  
601 indices of the orienting reflex. *Psychophysiology*, 48(12), 1648-1655.
- 602 33. Harms, L., Parras, G. G., Michie, P. T., & Malmierca, M. S. (2020). The Role of Glutamate  
603 Neurotransmission in Mismatch Negativity (MMN), A Measure of Auditory Synaptic  
604 Plasticity and Change-detection. *Neuroscience*.
- 605 34. Murphy, P. R., Robertson, I. H., Balsters, J. H., & O'Connell, R. G. (2011). Pupillometry  
606 and P3 index the locus coeruleus–noradrenergic arousal function in  
607 humans. *Psychophysiology*, 48(11), 1532-1543.
- 608 35. Nieuwenhuis, S., Aston-Jones, G., & Cohen, J. D. (2005). Decision making, the P3, and the  
609 locus coeruleus--norepinephrine system. *Psychological bulletin*, 131(4), 510.
- 610 36. Urai, A. E., Braun, A., & Donner, T. H. (2017). Pupil-linked arousal is driven by decision  
611 uncertainty and alters serial choice bias. *Nature communications*, 8(1), 1-11.
- 612 37. de Gee, J. W., Knapen, T., & Donner, T. H. (2014). Decision-related pupil dilation reflects  
613 upcoming choice and individual bias. *Proceedings of the National Academy of  
614 Sciences*, 111(5), E618-E625.
- 615 38. Krishnamurthy, K., Nassar, M. R., Sarode, S., & Gold, J. I. (2017). Arousal-related  
616 adjustments of perceptual biases optimize perception in dynamic environments. *Nature  
617 human behaviour*, 1(6), 1-11.
- 618 39. Gilzenrat, M. S., Nieuwenhuis, S., Jepma, M., & Cohen, J. D. (2010). Pupil diameter tracks  
619 changes in control state predicted by the adaptive gain theory of locus coeruleus  
620 function. *Cognitive, Affective, & Behavioral Neuroscience*, 10(2), 252-269.
- 621 40. Batista-Brito, R., Zagha, E., Ratliff, J. M., & Vinck, M. (2018). Modulation of cortical  
622 circuits by top-down processing and arousal state in health and disease. *Current opinion in  
623 neurobiology*, 52, 172-181.
- 624 41. Joshi, S., Li, Y., Kalwani, R. M., & Gold, J. I. (2016). Relationships between pupil  
625 diameter and neuronal activity in the locus coeruleus, colliculi, and cingulate  
626 cortex. *Neuron*, 89(1), 221-234.
- 627 42. Varazzani, C., San-Galli, A., Gilardeau, S., & Bouret, S. (2015). Noradrenaline and  
628 dopamine neurons in the reward/effort trade-off: a direct electrophysiological comparison  
629 in behaving monkeys. *Journal of Neuroscience*, 35(20), 7866-7877.
- 630 43. Murphy, P. R., O'Connell, R. G., O'sullivan, M., Robertson, I. H., & Balsters, J. H. (2014).  
631 Pupil diameter covaries with BOLD activity in human locus coeruleus. *Human brain  
632 mapping*, 35(8), 4140-4154.
- 633 44. Sales, A. C., Friston, K. J., Jones, M. W., Pickering, A. E., & Moran, R. J. (2019). Locus  
634 Coeruleus tracking of prediction errors optimises cognitive flexibility: An Active Inference  
635 model. *PLoS computational biology*, 15(1), e1006267.

- 636 45. Totah, N. K., Logothetis, N. K., & Eschenko, O. (2020). Synchronous spiking associated  
637 with high gamma oscillations in prefrontal cortex exerts top-down control over a 5Hz-  
638 rhythmic modulation of spiking in locus coeruleus. *bioRxiv*.
- 639 46. Gompf, H. S., Mathai, C., Fuller, P. M., Wood, D. A., Pedersen, N. P., Saper, C. B., & Lu,  
640 J. (2010). Locus ceruleus and anterior cingulate cortex sustain wakefulness in a novel  
641 environment. *Journal of Neuroscience*, *30*(43), 14543-14551.
- 642 47. Aston-Jones G. 1985. Behavioral functions of locus coeruleus derived from cellular  
643 attributes. *Physiol. Psych.* 13:118–26
- 644 48. Tadel, F., Baillet, S., Mosher, J. C., Pantazis, D., & Leahy, R. M. (2011). Brainstorm: a  
645 user-friendly application for MEG/EEG analysis. *Computational intelligence and*  
646 *neuroscience*, 2011.
- 647 49. Makeig, S., Bell, A. J., Jung, T. P., & Sejnowski, T. J. (1996). Independent component  
648 analysis of electroencephalographic data. In *Advances in neural information processing*  
649 *systems* (pp. 145-151).
- 650 50. Gramfort, A., Papadopoulos, T., Olivi, E., & Clerc, M. (2010). OpenMEEG: opensource  
651 software for quasistatic bioelectromagnetics. *Biomedical engineering online*, *9*(1), 45.
- 652 51. Fonov, V. S., Evans, A. C., McKinstry, R. C., Almlie, C. R., & Collins, D. L. (2009).  
653 Unbiased nonlinear average age-appropriate brain templates from birth to  
654 adulthood. *NeuroImage*, (47), S102.
- 655 52. Pascual-Marqui, R. D. (2002). Standardized low-resolution brain electromagnetic  
656 tomography (sLORETA): technical details. *Methods Find Exp Clin Pharmacol*, *24*(Suppl  
657 D), 5-12.
- 658 53. Knapen, T., de Gee, J. W., Brascamp, J., Nuiten, S., Hoppenbrouwers, S., & Theeuwes, J.  
659 (2016). Cognitive and ocular factors jointly determine pupil responses under  
660 equiluminance. *PloS one*, *11*(5), e0155574.
